# Supplementary material
Source: PubMed Central journal article supplement (PMC3460618)
Supplement: Supp_Fig1.pdf [file Supp_Fig1.pdf]

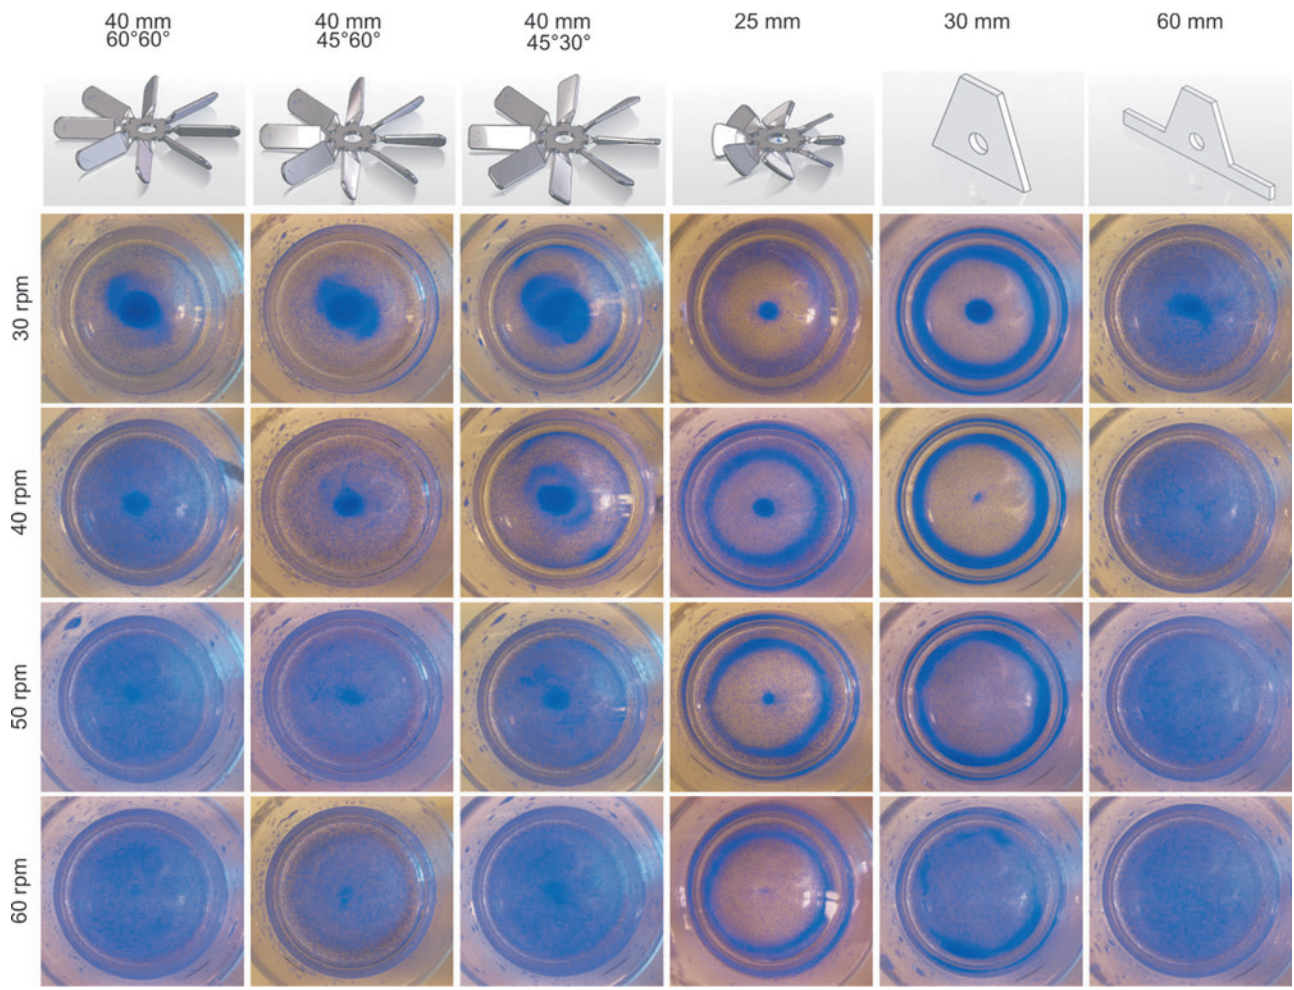

SUPPLEMENTARY FIG. S1. Impact of stirrer design and stirring speed on microcarrier distribution.
