# Supplementary material
Source: PubMed Central journal article supplement (PMC3460618)
Supplement: Supp_Fig2.pdf [file Supp_Fig2.pdf]

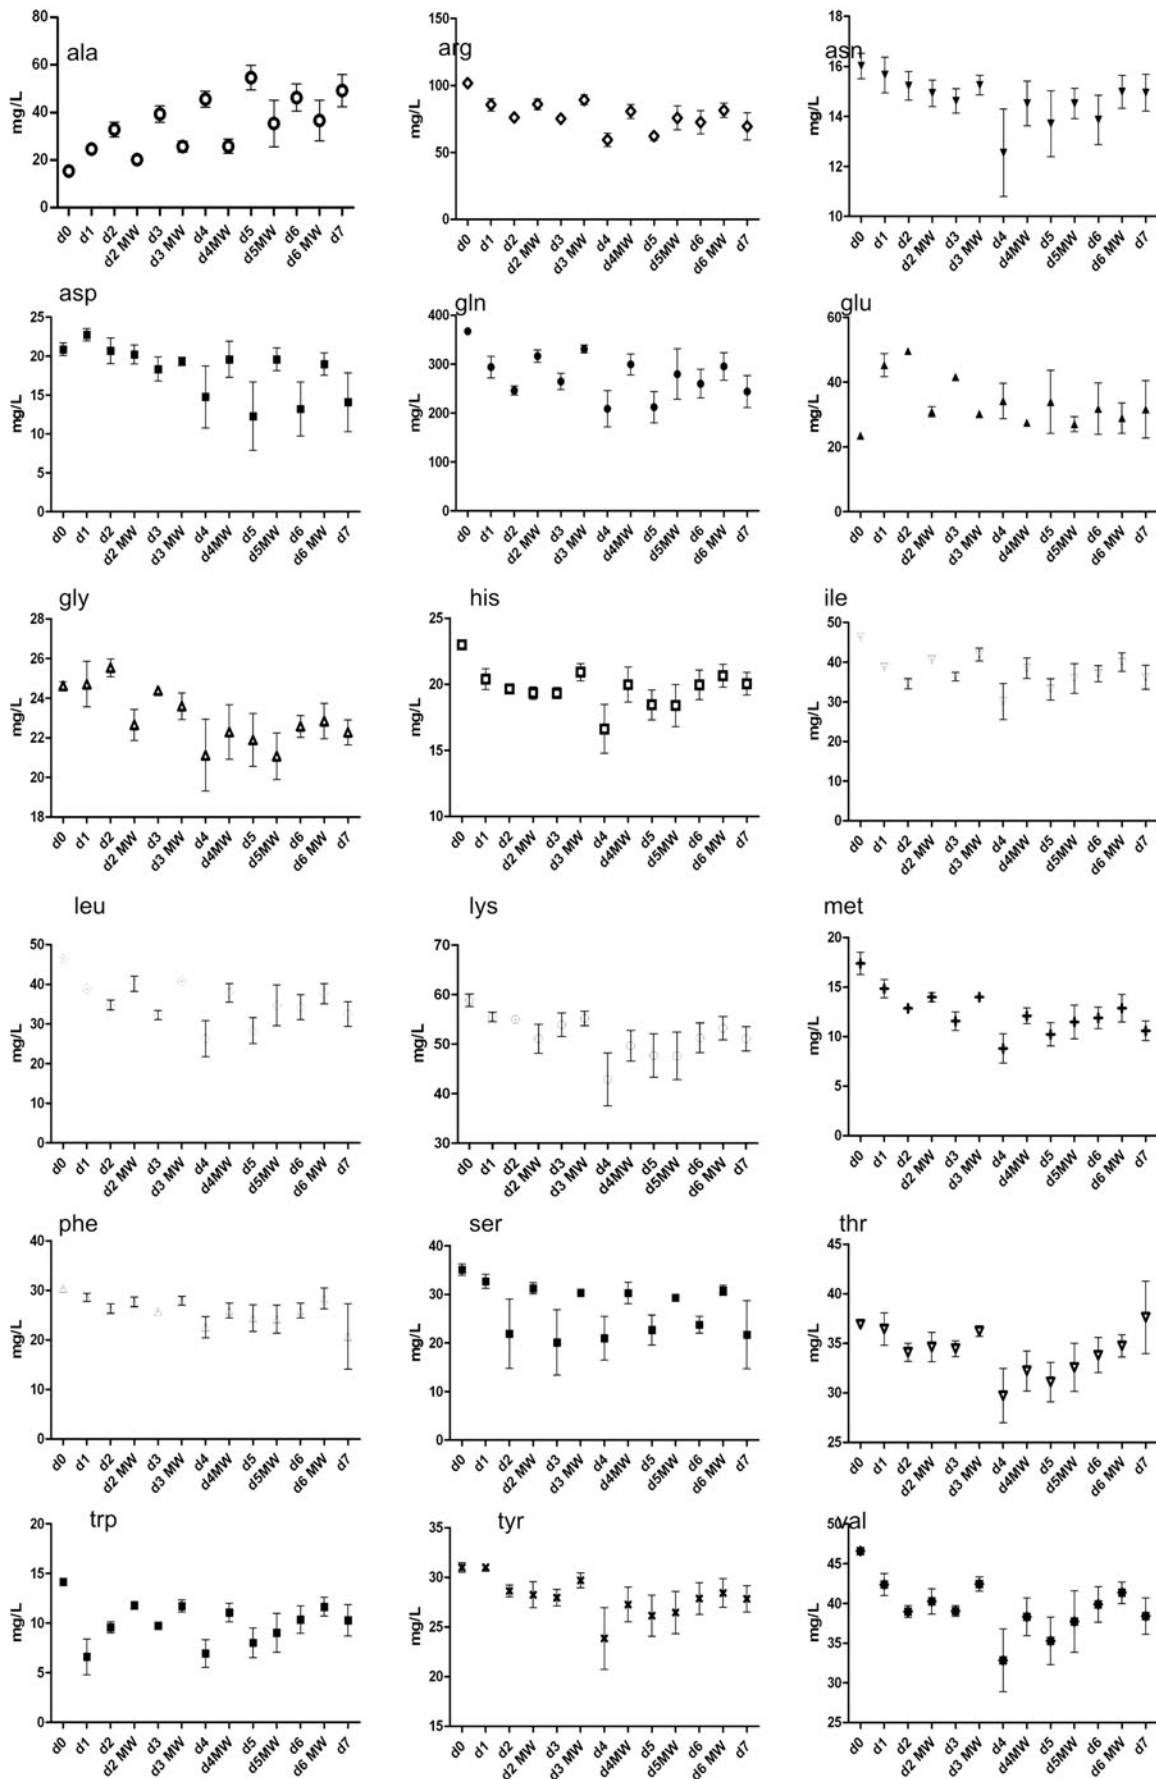

**SUPPLEMENTARY FIG. S2.** Analyses of the amino acid metabolism during stirred suspension cultures. Amounts of amino acids were analyzed by high-performance liquid chromatography. Samples were taken every 24h of culture and additionally after media exchange.  $n = 4$ .
