# Supplementary material
Source: PubMed Central journal article supplement (PMC3460618)
Supplement: Supp_Fig3.pdf [file Supp_Fig3.pdf]

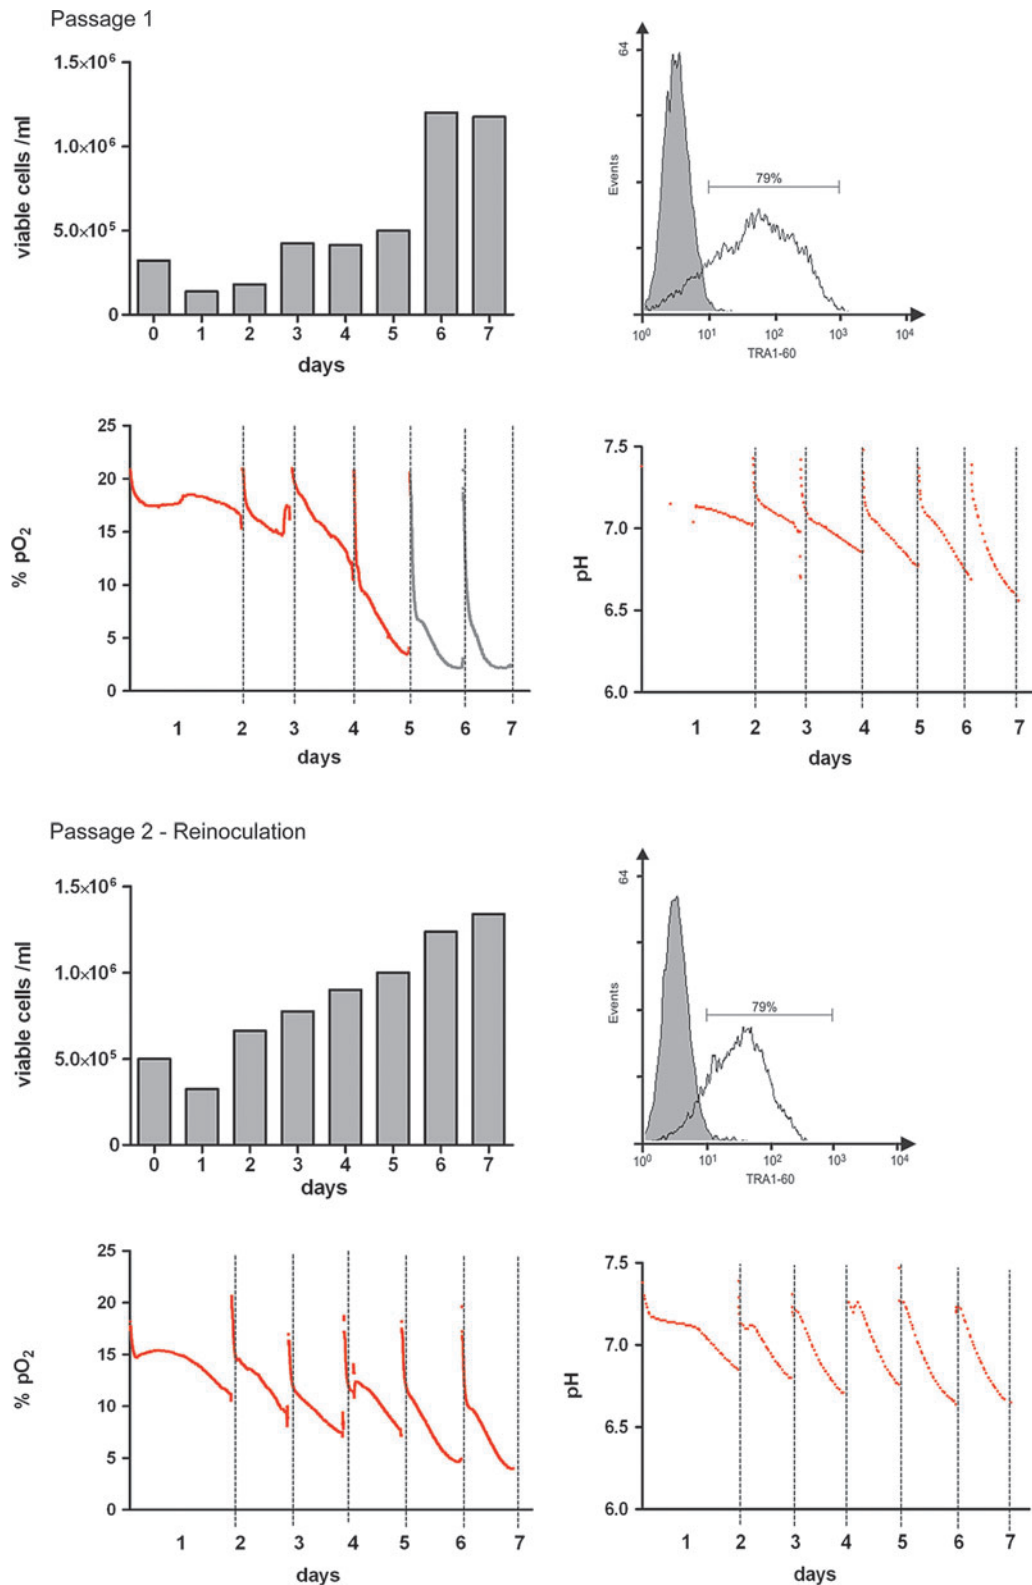

**SUPPLEMENTARY FIG. S3.** Successful serial passaging of bioreactor-expanded cells. Cells from a successful bioreactor run were utilized to re-inoculate a subsequent experiment. Comparable expansion rates of up to 2.7-fold were achieved in both experiments; note that the first experiment was inoculated at  $4 \times 10^5$  cells/mL whereas the subsequent second passage was inoculated at  $5 \times 10^5$  cells/mL, respectively. The culture media were replaced daily from day 3 onward (dashed lines) resulting in similar characteristics of pH and oxygen patterns in both experiments underscoring experimental reproducibility and feasibility of serial passaging. Flow cytometry revealed that the majority of cells expressed pluripotency-associated surface marker TRA 1-60 (A; isotope control shown in grey).
