# Supplementary material
Source: PubMed Central journal article supplement (PMC3460618)
Supplement: Supp_Fig4.pdf [file Supp_Fig4.pdf]

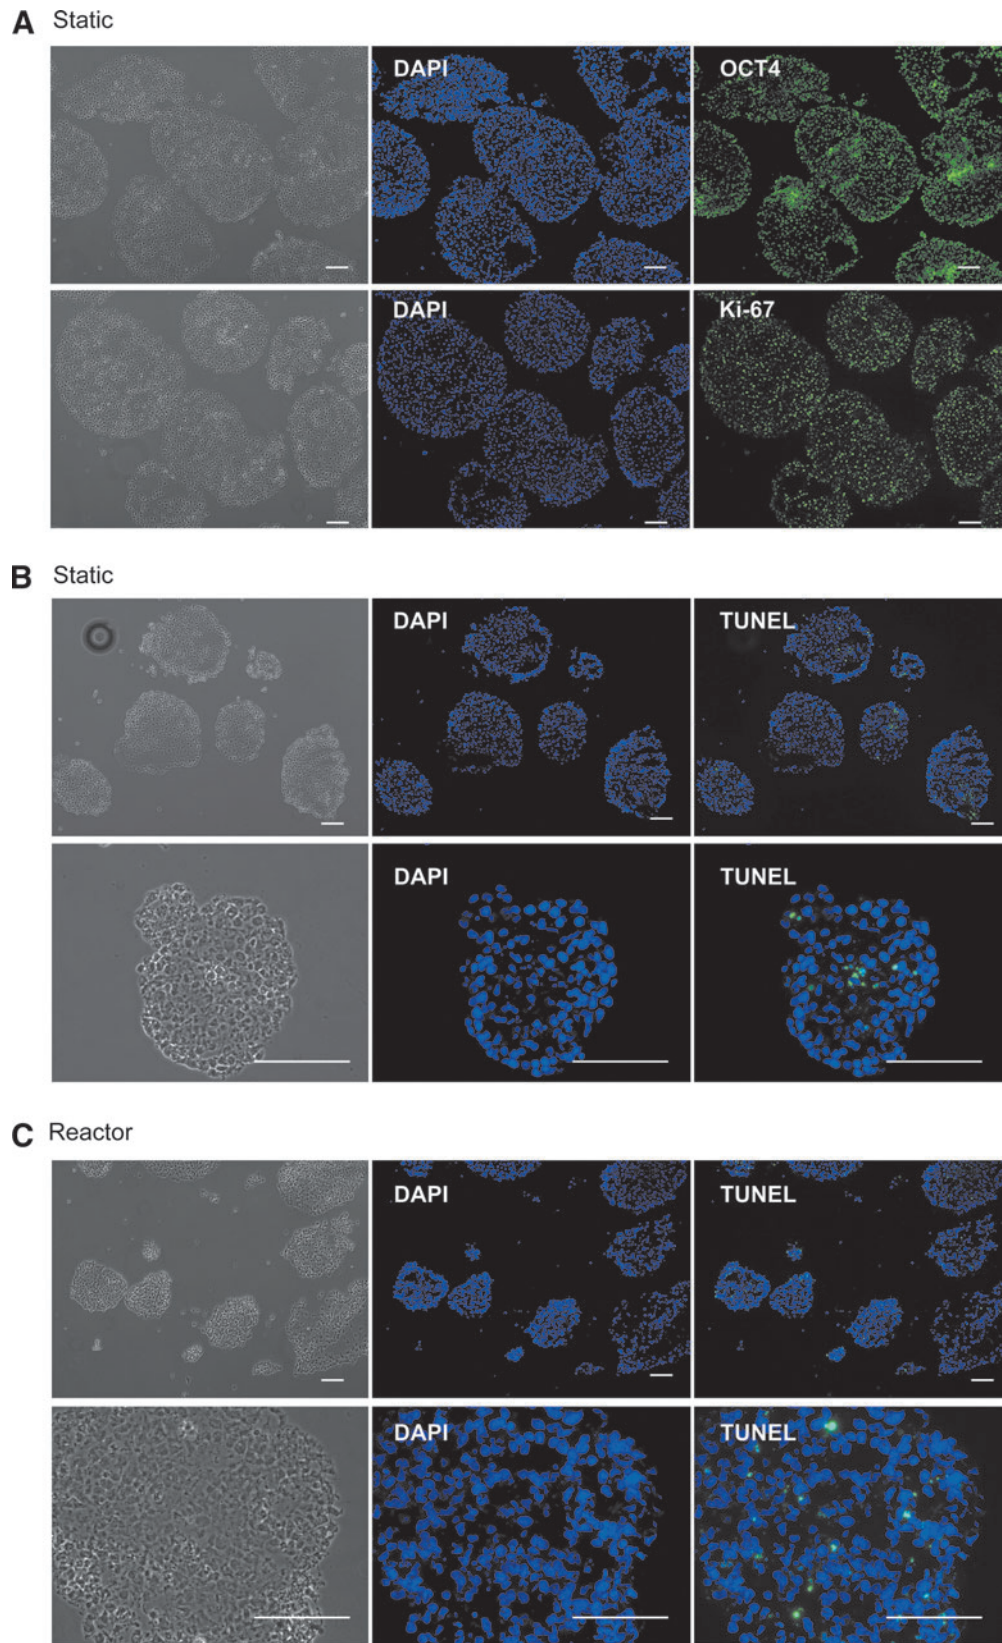

**SUPPLEMENTARY FIG. S4.** Pluripotency marker expression and terminal deoxynucleotidyl transferase dUTP nick end labeling (TUNEL) assay on aggregate sections. Immunofluorescence of cryosectioned aggregates revealed positive staining for the pluripotency-associated marker OCT4 and the proliferation-associated marker Ki-67 on aggregates expanded in static suspension culture providing meaningful controls (**A**). TUNEL assay showed equivalent amount and distribution of apoptotic cells within aggregate sections derived from static cultures (**B**) or the reactor expansion processes (**C**), respectively. Respective isotype/negative controls confirmed specificity of stainings (data not shown). Scale bars = 100  $\mu\text{m}$ .
