# Supplementary material
Source: PubMed Central journal article supplement (PMC3460618)
Supplement: Supp_Table1.pdf [file Supp_Table1.pdf]

SUPPLEMENTARY TABLE S1. OLIGONUCLEOTIDES USED FOR CONVENTIONAL  
REVERSE TRANSCRIPTASE-POLYMERASE CHAIN REACTION

| <i>Primer name</i> | <i>Target</i> | <i>Position</i> | <i>Annealing temperature</i> | <i>Product size</i> | <i>Sequence</i>          |
|--------------------|---------------|-----------------|------------------------------|---------------------|--------------------------|
| GAPDH sense        | GI 7669491    | 555             | 55°C                         | 352 bp              | GGCCAAGGTC ATCCATGA      |
| GAPDH ras          |               | 907             |                              |                     | TCAGTGTAGC CCAGGATG      |
| TBX5 sense         | GI 31652233   | 1303            | 55°C                         | 108 bp              | AGCAGTGACTIONCCTACCAGAAC |
| TBX5 ras           |               | 1411            |                              |                     | TGACATTCTGTGCAGCTCCAT    |
| TBX20 sense        | GI 31652229   | 486             | 50°C                         | 470 bp              | AGGTACCGCTACGCCTAC       |
| TBX20 ras          |               | 893             |                              |                     | GTCAGTGAGCCTGGAGGA       |
| MLC2a sense        | GI 20380769   | 4               | 60°C                         | 446 bp              | GAGGAGAATGGCCAGCAGGAA    |
| MLC2a ras          |               | 451             |                              |                     | GCGAACATCTGCTCCACCTCA    |
| AFP sense          | GI 20379786   | 1518            | 55°C                         | 255 bp              | ACTCCAGTAAACCCCTGGTGTTG  |
| AFP ras            |               | 1772            |                              |                     | GAAATCTGCAATGACAGCCTCA   |
| TTR sense          | GI 18089144   | 228             | 55°C                         | 153 bp              | AAAACCAGTGAGTCTGGAGAGC   |
| TTR ras            |               | 380             |                              |                     | GTTGGCTGTGAATACCACCTCT   |
| WNT1 sense         | GI 16936523   | 306             | 55°C                         | 190 bp              | TATTGTGAACGTAGCCTCCT     |
| WNT1 ras           |               | 495             |                              |                     | ATCCCGAACTGCCACTTG       |
| FGF5 sense         | GI 73486654   | 570             | 55°C                         | 253 bp              | ATCCACGAAGCCAATATGTTA    |
| FGF5 ras           |               | 822             |                              |                     | GTGAAAGAAAGTTCTGGCTGCT   |
