# Supplementary material
Source: PubMed Central journal article supplement (PMC3460618)
Supplement: Supp_Table2.pdf [file Supp_Table2.pdf]

SUPPLEMENTARY TABLE S2. OLIGONUCLEOTIDES USED FOR REAL TIME-POLYMERASE CHAIN REACTION

| <i>Primer name</i> | <i>Target</i> | <i>Position</i> | <i>Annealing temperature</i> | <i>Product size</i> | <i>Sequence</i>         |
|--------------------|---------------|-----------------|------------------------------|---------------------|-------------------------|
| hOCT4-F4           | GI 116235483  | 3'UTR           | 60°c                         | 104 bp              | TCCCATGCATTCAAACCTGAGG  |
| hOCT4-R4           |               | 1119,1266       |                              |                     | CCTTTGTGTTCCCAATTCCTTCC |
| hNANOG-F6          | GI 153945815  | 3'UTR           | 60°C                         | 143 bp              | GGACACTGGCTGAATCCT TCC  |
| hNANOG-R6          |               | 1190,1292       |                              |                     | CTCGCTGATTAGGCTCCAACC   |
| β-Actin sense      | GI 5016088    | 23              | 55°C–60°C                    | 176 bp              | AGCCTCGCCTTTGCCGA       |
| β-Actin ras        |               | 196             |                              |                     | CTGGTGCCTGGGGCG         |
